# Supplementary material
Source: bioRxiv or medRxiv preprint supplement (https://medrxiv.org/highwire/filestream/88391/field_highwire_adjunct_files/0/2020.07.02.20145508-1.pdf)
Supplement: Supplementary file [file 2020.07.02.20145508-1.pdf]

## Supplement

### **Firearm Purchasing and Firearm Violence in the First Months of the Coronavirus Pandemic in the United States**

Julia P. Schleimer, MPH, Christopher D. McCort, MS, Veronica A. Pear, MPH, Aaron Shev, PhD,  
Elizabeth Tomsich, PhD, Rameesha Asif-Sattar, BS, Shani Buggs, PhD, MPH, Hannah S. Laqueur,  
PhD, MA, MPA, Garen J. Wintemute, MD, MPH

Supplementary Table 1. Gun Violence Archive Event Characteristics

Supplementary Figure 1. Directed Acyclic Graph

Supplementary Table 2. Additional Information, Data Sources and Variables

Supplementary Figure 2. Map of excess purchases by US state

Supplementary Figure 3. Ranked baseline and excess purchases by US state

Supplementary Table 3. Association between 1-month lagged changes in firearm purchasing  
and interpersonal firearm violence

Supplementary Table 4. Association between changes in firearm purchasing and interpersonal  
firearm violence events

Supplementary Table 5. Association between changes in firearm purchasing and firearm injuries  
per events

Supplementary Table 6. Robustness check 1, firearm purchasing defined as percentage change  
from expected

Supplementary Table 7. Robustness check 2, DC and events in which a child injured or killed  
someone else excluded

Supplementary Table 8. Robustness check 3, state-specific linear trends

Supplementary Table 9. Robustness check 4, adjust for all-cause mortality

Supplementary Table 10. Robustness check 5, leading values of the exposure

Supplementary Table 11. STROBE Statement—Checklist of items that should be included in  
reports of *cross-sectional studies*

**Supplementary Table 1. Gun Violence Archive Event Characteristics**

|                                                                              |
|------------------------------------------------------------------------------|
| Suicide*                                                                     |
| Suicide – Attempt*                                                           |
| Non-Shooting Incident*                                                       |
| Shots Fired - No Injuries*                                                   |
| Accidental Shooting*                                                         |
| Accidental Shooting – Death*                                                 |
| Accidental Shooting – Injury*                                                |
| Accidental Shooting at a Business*                                           |
| Accidental Negligent Discharge*                                              |
| Mistaken ID*                                                                 |
| Self-Inflicted*                                                              |
| Stray bullet*                                                                |
| Hunting accident*                                                            |
| Cleaning gun*                                                                |
| Thought gun was unloaded*                                                    |
| Playing with gun*                                                            |
| Child with gun - no shots fired*                                             |
| Child killed self*                                                           |
| Child injured self*                                                          |
| Home Invasion - No death or injury*                                          |
| Officer Involved Incident - Weapon involved but no shots fired*              |
| Officer Involved Shooting - Accidental discharge - no injury required*       |
| Officer Involved Shooting - Shots fired no injury*                           |
| Officer Involved Shooting – subject suspect perpetrator suicide by cop*      |
| Officer Involved Shooting - subject suspect perpetrator suicide at standoff* |
| Defensive Use - Shots fired no injury death*                                 |
| Defensive use - No shots fired*                                              |
| Defensive Use - WITHOUT a gun*                                               |
| Gun at school no death injury – elementary secondary school*                 |
| Gun at school no death injury – university college*                          |
| LOCKDOWNALERT ONLY - No GV Incident Occurred Onsite*                         |
| Shot – Wounded Injured                                                       |
| Shot - Dead                                                                  |
| Murder Suicide                                                               |
| Attempted Murder Suicide                                                     |
| Child Involved Incident                                                      |
| Child picked up & fired gun**                                                |
| Child killed by child**                                                      |
| Child injured by child**                                                     |
| Child killed                                                                 |
| Child injured                                                                |

|                                                                               |
|-------------------------------------------------------------------------------|
| Home Invasion                                                                 |
| Home Invasion - Resident killed                                               |
| Home Invasion - Resident injured                                              |
| Home Invasion – subject suspect perpetrator killed                            |
| Home Invasion – subject suspect perpetrator injured                           |
| Officer Involved Incident                                                     |
| Officer Involved Shooting - Officer shot                                      |
| Officer Involved Shooting - Officer killed                                    |
| Officer Involved Shooting – subject suspect perpetrator shot                  |
| Officer Involved Shooting - subject suspect perpetrator killed                |
| Officer Involved Shooting – subject suspect perpetrator surrender at standoff |
| Officer Involved Shooting - Bystander shot                                    |
| Officer Involved Shooting - Bystander killed                                  |
| Officer Involved Shooting - K9Mounted injured                                 |
| Officer Involved Shooting - K9Mounted killed                                  |
| Officer Involved Shooting – subject suspect perpetrator unarmed               |
| Police Targeted                                                               |
| Red Flag Extreme Risk Protection Orders                                       |
| ATFLE Confiscation Raid Arrest                                                |
| Defensive Use                                                                 |
| Defensive Use - subject suspect perpetrator unarmed                           |
| Defensive Use - Crime occurs victim shoots subject suspect perpetrator        |
| Defensive Use - Stand Your Ground Castle Doctrine established                 |
| Defensive Use - Good Samaritan Third Party                                    |
| School Incident                                                               |
| School Shooting - elementary secondary school                                 |
| School Shooting – university college                                          |
| Drive-by                                                                      |
| Spree Shooting                                                                |
| Mass Murder                                                                   |
| Mass Shooting                                                                 |
| Shootout                                                                      |
| Bar club incident - in or around establishment                                |
| Gun range gun shop gun show shooting                                          |
| House party Block Party Park Party                                            |
| Road rage                                                                     |
| Hate crime                                                                    |
| CV (coronavirus)                                                              |
| Political Violence                                                            |
| Terrorism Involvement                                                         |
| Gang involvement                                                              |
| Drug involvement                                                              |
| Workplace shooting                                                            |

|                                                               |
|---------------------------------------------------------------|
| Domestic Violence                                             |
| Sex crime involving firearm                                   |
| Armed robbery with injury death and or evidence of DGU found  |
| Kidnapping abductions hostage                                 |
| Car-jacking                                                   |
| Under the influence of alcohol or drugs                       |
| TSA Action                                                    |
| Criminal act with stolen gun                                  |
| Possession                                                    |
| Possession of gun by felon or prohibited person               |
| Unlawful purchase sale                                        |
| Ghost gun                                                     |
| BB Pellet Replica gun                                         |
| Brandishing flourishing open carry lost found                 |
| Gun stolen from owner                                         |
| Guns stolen from law enforcement                              |
| Gun shop robbery or burglary                                  |
| Stolen Illegally owned gun{s} recovered during arrest warrant |
| Concealed Carry License - Victim                              |
| Concealed Carry License - Perpetrator                         |
| Gun buy back action                                           |
| Assault weapon                                                |

Note. Table reproduced from Gun Violence Archive.<sup>1</sup> Incident characteristics are not mutually exclusive.

\*Excluded from current study. Also excluded were incidents in which no one was injured or killed and those without any incident characteristics.

\*\*Excluded in sensitivity analysis

Supplementary Figure 1. Directed Acyclic Graph

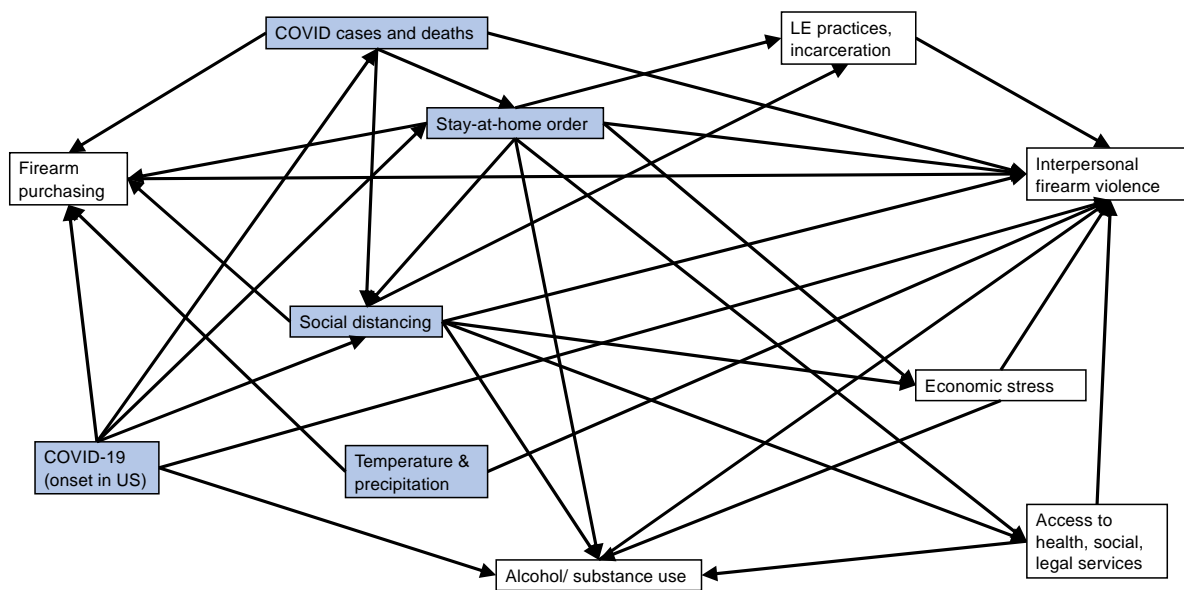

Note. Shaded boxes indicate variables needed to control for confounding. Relationships are conditional on state fixed effects.  
LE = law enforcement.

**Supplementary Table 2. Additional Information, Data Sources and Variables**

| Variable                             | Source                                                                                                                                                                    | Description                                                                                                                                     | Notes                                                                                                         |
|--------------------------------------|---------------------------------------------------------------------------------------------------------------------------------------------------------------------------|-------------------------------------------------------------------------------------------------------------------------------------------------|---------------------------------------------------------------------------------------------------------------|
| COVID cases and deaths               | Johns Hopkins University <a href="#">Center for Systems Science and Engineering</a> , time series of <a href="#">cases</a> and <a href="#">deaths</a>                     | Cumulative number of monthly confirmed COVID cases and deaths                                                                                   | Accessed June 4, 2020                                                                                         |
| Temperature and precipitation        | <a href="#">PRISM Climate Group</a> , Oregon State University                                                                                                             | Average monthly temperature (degrees Fahrenheit) and precipitation (inches)                                                                     | Accessed June 5, 2020. Bulk download requires latitude and longitude; we used the lat/long of state capitals. |
| State stay-home orders               | New York Times, <a href="#">Mervosh et al., 2020a</a> <sup>2</sup> (version April 20, 2020) and <a href="#">Mervosh et al., 2020b</a> <sup>3</sup> (version June 4, 2020) | Proportion of month state-wide stay-home order was in place                                                                                     | Accessed June 4, 2020                                                                                         |
| Movement                             | <a href="#">Apple mobility trends</a> <sup>4</sup>                                                                                                                        | Monthly average of daily changes in requests for directions for all transportation types (driving, transit, and walking) since January 13, 2020 | Accessed June 11, 2020 via the covdata R package <sup>5</sup>                                                 |
| Socioeconomic disadvantage index     |                                                                                                                                                                           | Index reflects the first principal component of the following 6 variables; higher values indicate greater disadvantage                          |                                                                                                               |
| High school graduation               | 2020 County Health Rankings (CHR); <sup>6</sup> State-specific sources (years vary)                                                                                       | Percentage of ninth-grade cohort that graduates in four years                                                                                   | State average of counties weighted by size of freshman cohort <sup>a</sup>                                    |
| Some college                         | 2020 CHR; <sup>6</sup> American Community Survey, 5-year estimates (2014-2018)                                                                                            | Percentage of adults ages 25-44 with some post-secondary education                                                                              | State average of counties weighted by adult population aged 25-44 <sup>a</sup>                                |
| Unemployment                         | 2020 CHR; <sup>6</sup> Bureau of Labor Statistics (2018)                                                                                                                  | Percentage of population ages 16 and older unemployed but seeking work                                                                          | State average of counties weighted by population in labor force <sup>a</sup>                                  |
| Children in poverty                  | 2020 CHR; <sup>6</sup> Small Area Income and Poverty Estimates (2018)                                                                                                     | Percentage of people under age 18 in poverty                                                                                                    | State average of counties weighted by population <18 <sup>a</sup>                                             |
| Income inequality                    | 2020 CHR; <sup>6</sup> American Community Survey, 5-year estimates (2014-2018)                                                                                            | Ratio of household income at the 80th percentile to income at the 20th percentile                                                               | State average of counties weighted by number of households <sup>a</sup>                                       |
| Children in single-parent households | 2020 CHR; <sup>6</sup> American Community Survey, 5-                                                                                                                      | Percentage of children that live in a household headed by single parent                                                                         | State average of counties weighted by number of households <sup>a</sup>                                       |

|                                                      |                                                                                |                                                                                                                                                     |                                                                                                    |
|------------------------------------------------------|--------------------------------------------------------------------------------|-----------------------------------------------------------------------------------------------------------------------------------------------------|----------------------------------------------------------------------------------------------------|
|                                                      | year estimates (2014-2018)                                                     |                                                                                                                                                     |                                                                                                    |
| Violent crime rate                                   | <a href="#">Uniform Crime Reporting</a> – FBI (2014-2018)                      | Number of reported violent crime offenses per 100,000 population                                                                                    | Violent crimes include murder and nonnegligent manslaughter, rape, robbery, and aggravated assault |
| % Rural                                              | 2020 CHR; <sup>6</sup> Census Population Estimates (2010)                      | Percentage of population living in a rural area                                                                                                     | State average of counties weighted by 2018 resident population <sup>a</sup>                        |
| Residential segregation - Black/White                | 2020 CHR; <sup>6</sup> American Community Survey, 5-year estimates (2014-2018) | Index of dissimilarity <sup>7</sup> where higher values indicate greater residential segregation between Black and White county residents           | State average of counties weighted by 2018 population <sup>a</sup>                                 |
| Firearm ownership prevalence                         | WISQARS <sup>8</sup> 2014-2018                                                 | Proportion of suicides completed with a firearm <sup>9</sup>                                                                                        |                                                                                                    |
| All-cause mortality                                  | Centers for Disease Control and Prevention                                     | Weekly Counts of Deaths by State and Select Causes, <a href="#">2019-2020</a> and <a href="#">2014-2018</a>                                         |                                                                                                    |
| Population estimates for rate calculations over time | <a href="#">US Census</a>                                                      | Annual Estimates of the Resident Population for the United States, Regions, States, and Puerto Rico: April 1, 2010 to July 1, 2019 (NST-EST2019-01) | Data for 2020 extrapolated with cubic regression                                                   |

<sup>a</sup> If weights missing, we used the analogous CHR state values.





Supplementary Figure 3. Ranked baseline and excess purchases by US state

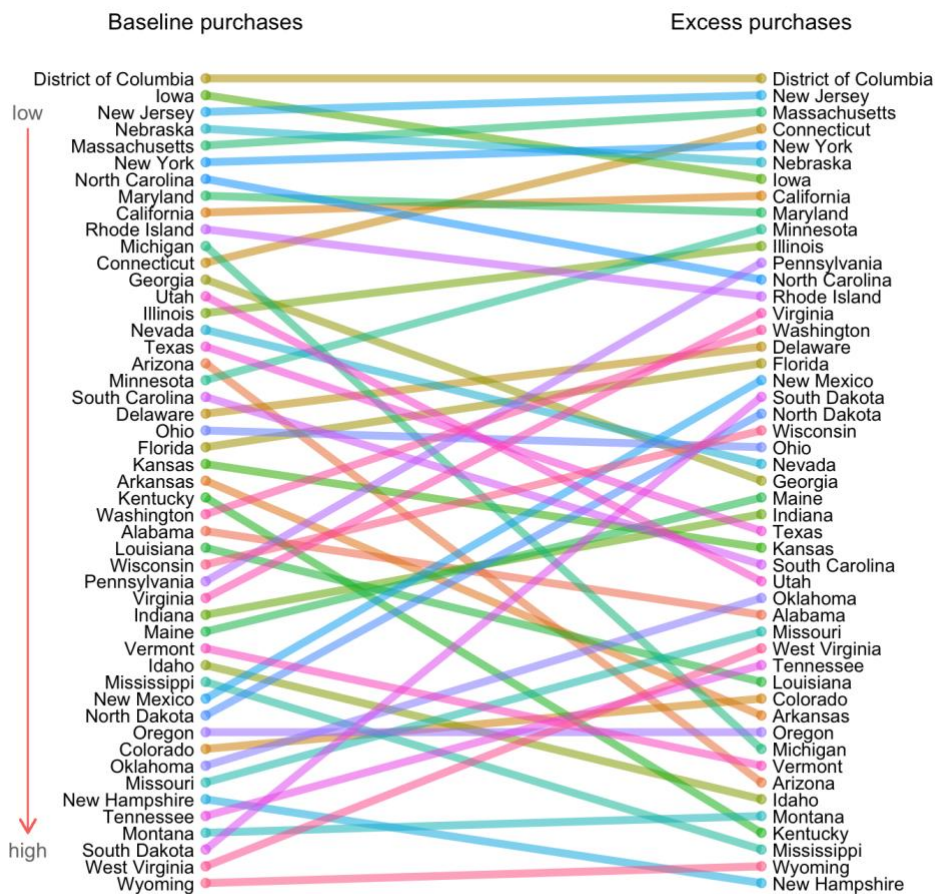

Correlation 0.72

Note. States are ranked according to their relative number of baseline purchases per 100,000 population (averaged from January 2018 to February 2020) and excess purchases per 100,000 population, cumulated from March through May 2020.

**Supplementary Table 3. Association between 1-month lagged changes in firearm purchasing and interpersonal firearm violence**

|                             | RR                 | 95% CI |       |
|-----------------------------|--------------------|--------|-------|
| March, 2020                 | 0.973              | 0.901  | 1.050 |
| Cumulative excess purchases | 1.013 <sup>a</sup> | 1.005  | 1.021 |
| COVID cases and deaths      | 1.017 <sup>a</sup> | 1.007  | 1.027 |
| Stay-at-home order          | 1.032              | 0.905  | 1.178 |
| Movement                    | 1.002              | 0.999  | 1.005 |
| Average precipitation       | 0.998              | 0.994  | 1.003 |
| Average temperature         | 1.011 <sup>b</sup> | 1.006  | 1.016 |

Note. Results are from negative binomial regression model with indicators for state, year, and month, and the log of the population as an offset. The outcome is counts of firearm injuries (non-fatal and fatal).

<sup>a</sup> P<0.05

<sup>b</sup> P<0.001

**Supplementary Table 4. Association between changes in firearm purchasing and interpersonal firearm violence events**

|                             | RR                 | 95% CI |       |
|-----------------------------|--------------------|--------|-------|
| March, 2020                 | 0.934              | 0.853  | 1.023 |
| Cumulative excess purchases | 1.014 <sup>a</sup> | 1.002  | 1.026 |
| COVID cases and deaths      | 1.015 <sup>a</sup> | 1.006  | 1.025 |
| Stay-at-home order          | 1.125              | 0.997  | 1.296 |
| Movement                    | 1.003              | 1.000  | 1.005 |
| Average precipitation       | 0.999              | 0.995  | 1.003 |
| Average temperature         | 1.011 <sup>b</sup> | 1.006  | 1.015 |

Note. Results are from negative binomial regression model with indicators for state, year, and month, and the log of the population as an offset. The outcome is counts of events resulting in any injury or death.

<sup>a</sup> P<0.05

<sup>b</sup> P<0.001

**Supplementary Table 5. Association between changes in firearm purchasing and firearm injuries per events**

|                             | Estimate           | 95% CI |       |
|-----------------------------|--------------------|--------|-------|
| March, 2020                 | 0.056              | -0.032 | 0.144 |
| Cumulative excess purchases | -0.002             | -0.017 | 0.013 |
| COVID cases and deaths      | 0.001              | -0.008 | 0.010 |
| Stay-at-home order          | -0.070             | -0.169 | 0.030 |
| Movement                    | -0.001             | -0.003 | 0.002 |
| Average precipitation       | -0.002             | -0.006 | 0.001 |
| Average temperature         | 0.003 <sup>a</sup> | 0.001  | 0.006 |

Note. Results are from linear regression model with indicators for state, year, and month. The outcome is the ratio of injuries to events.

<sup>a</sup> P<0.05

<sup>b</sup> P<0.001

**Supplementary Table 6. Robustness check 1, firearm purchasing defined as percentage change from expected**

|                                                | RR                 | 95% CI |       |
|------------------------------------------------|--------------------|--------|-------|
| March, 2020                                    | 0.956              | 0.883  | 1.036 |
| Cumulative % change in purchasing <sup>c</sup> | 1.049 <sup>a</sup> | 1.010  | 1.091 |
| COVID cases and deaths                         | 1.016 <sup>a</sup> | 1.006  | 1.026 |
| Stay-at-home order                             | 1.047              | 0.917  | 1.196 |
| Movement                                       | 1.002              | 0.999  | 1.005 |
| Average precipitation                          | 0.998              | 0.993  | 1.003 |
| Average temperature                            | 1.011 <sup>b</sup> | 1.006  | 1.016 |

Note. Results are from negative binomial regression model with indicators for state, year, and month, and the log of the population as an offset. The outcome is counts of firearm injuries (non-fatal and fatal).

<sup>a</sup> P<0.05

<sup>b</sup> P<0.001

<sup>c</sup> (Observed rate – expected rate)/expected rate

**Supplementary Table 7. Robustness check 2, District of Columbia and events in which a child injured or killed someone else excluded**

|                             | Excluding DC       |        |       | Excluding child-perpetrated events |        |       |
|-----------------------------|--------------------|--------|-------|------------------------------------|--------|-------|
|                             | RR                 | 95% CI |       | RR                                 | 95% CI |       |
| March, 2020                 | 0.938              | 0.856  | 1.028 | 0.940                              | 0.861  | 1.026 |
| Cumulative excess purchases | 1.017 <sup>a</sup> | 1.006  | 1.027 | 1.015 <sup>a</sup>                 | 1.005  | 1.025 |
| COVID cases and deaths      | 1.014 <sup>b</sup> | 1.007  | 1.022 | 1.018 <sup>b</sup>                 | 1.008  | 1.027 |
| Stay-at-home order          | 1.102              | 0.987  | 1.231 | 1.052                              | 0.923  | 1.200 |
| Movement                    | 1.003 <sup>b</sup> | 1.002  | 1.005 | 1.002                              | 0.999  | 1.005 |
| Average precipitation       | 0.999              | 0.994  | 1.004 | 0.998                              | 0.994  | 1.003 |
| Average temperature         | 1.012 <sup>b</sup> | 1.008  | 1.016 | 1.011 <sup>b</sup>                 | 1.006  | 1.016 |

Note. Results are from negative binomial regression models with indicators for state, year, and month, and the log of the population as an offset. The outcome is counts of firearm injuries (non-fatal and fatal).

<sup>a</sup> P<0.05

<sup>b</sup> P<0.001

**Supplementary Table 8. Robustness check 3, state-specific linear trends**

|                             | RR                 | 95% CI |       |
|-----------------------------|--------------------|--------|-------|
| March, 2020                 | 0.856 <sup>a</sup> | 0.781  | 0.938 |
| Cumulative excess purchases | 1.030 <sup>b</sup> | 1.016  | 1.043 |
| COVID cases and deaths      | 1.023 <sup>b</sup> | 1.014  | 1.032 |
| Stay-at-home order          | 0.963              | 0.876  | 1.060 |
| Movement                    | 1.000              | 0.999  | 1.000 |
| Average precipitation       | 0.998              | 0.993  | 1.003 |
| Average temperature         | 1.011 <sup>b</sup> | 1.006  | 1.015 |

Note. Results are from negative binomial regression model with indicators for state, year, and month, and the log of the population as an offset. The outcome is counts of firearm injuries (non-fatal and fatal).

<sup>a</sup> P<0.05

<sup>b</sup> P<0.001

**Supplementary Table 9. Robustness check 4, adjust for all-cause mortality**

|                             | RR                 | 95% CI |       |
|-----------------------------|--------------------|--------|-------|
|                             | March, 2020        | 1.000  | 0.917 |
| Cumulative excess purchases | 1.011 <sup>a</sup> | 1.000  | 1.021 |
| All-cause mortality         | 1.293 <sup>b</sup> | 1.136  | 1.472 |
| COVID cases and deaths      | 1.014 <sup>a</sup> | 1.005  | 1.023 |
| Stay-at-home order          | 1.032              | 0.906  | 1.175 |
| Movement                    | 1.002              | 0.999  | 1.005 |
| Average precipitation       | 0.998              | 0.994  | 1.003 |
| Average temperature         | 1.011 <sup>b</sup> | 1.006  | 1.016 |

Note. Results are from negative binomial regression model with indicators for state, year, and month, and the log of the population as an offset. The outcome is counts of firearm injuries (non-fatal and fatal).

<sup>a</sup> P<0.05

<sup>b</sup> P<0.001

**Supplementary Table 10. Robustness check 5, leading values of the exposure**

|                             | 3-month lead       |        |       | 6-month lead       |        |       |
|-----------------------------|--------------------|--------|-------|--------------------|--------|-------|
|                             | RR                 | 95% CI |       | RR                 | 95% CI |       |
| March, 2020                 | 1.114 <sup>a</sup> | 1.001  | 1.241 | 1.031              | 0.962  | 1.105 |
| Cumulative excess purchases | 1.013 <sup>a</sup> | 1.000  | 1.025 | 1.006              | 0.998  | 1.015 |
| COVID cases and deaths      | 1.014 <sup>a</sup> | 1.003  | 1.024 | 1.014 <sup>a</sup> | 1.004  | 1.024 |
| Stay-at-home order          | 1.081              | 0.949  | 1.232 | 1.085              | 0.951  | 1.238 |
| Movement                    | 1.003              | 1.000  | 1.006 | 1.003              | 1.000  | 1.006 |
| Average precipitation       | 0.999              | 0.994  | 1.003 | 0.999              | 0.994  | 1.003 |
| Average temperature         | 1.010 <sup>b</sup> | 1.006  | 1.015 | 1.010 <sup>b</sup> | 1.005  | 1.015 |

Note. Results are from negative binomial regression models with indicators for state, year, and month, and the log of the population as an offset. The outcome is counts of firearm injuries (non-fatal and fatal).

<sup>a</sup> P<0.05

<sup>b</sup> P<0.001

Supplementary Table 11. STROBE Statement—Checklist of items that should be included in reports of *cross-sectional studies*

|                              | Item No | Recommendation                                                                                                                                                                                    | Page No |
|------------------------------|---------|---------------------------------------------------------------------------------------------------------------------------------------------------------------------------------------------------|---------|
| <b>Title and abstract</b>    | 1       | (a) Indicate the study's design with a commonly used term in the title or the abstract                                                                                                            | 2-3     |
|                              |         | (b) Provide in the abstract an informative and balanced summary of what was done and what was found                                                                                               | 3-4     |
| <b>Introduction</b>          |         |                                                                                                                                                                                                   |         |
| Background/rationale         | 2       | Explain the scientific background and rationale for the investigation being reported                                                                                                              | 5       |
| Objectives                   | 3       | State specific objectives, including any prespecified hypotheses                                                                                                                                  | 6       |
| <b>Methods</b>               |         |                                                                                                                                                                                                   |         |
| Study design                 | 4       | Present key elements of study design early in the paper                                                                                                                                           | 6-11    |
| Setting                      | 5       | Describe the setting, locations, and relevant dates, including periods of recruitment, exposure, follow-up, and data collection                                                                   | 6       |
| Participants                 | 6       | (a) Give the eligibility criteria, and the sources and methods of selection of participants                                                                                                       | 6       |
| Variables                    | 7       | Clearly define all outcomes, exposures, predictors, potential confounders, and effect modifiers. Give diagnostic criteria, if applicable                                                          | 6-10    |
| Data sources/<br>measurement | 8*      | For each variable of interest, give sources of data and details of methods of assessment (measurement). Describe comparability of assessment methods if there is more than one group              | 6-10    |
| Bias                         | 9       | Describe any efforts to address potential sources of bias                                                                                                                                         | 7, 9-11 |
| Study size                   | 10      | Explain how the study size was arrived at                                                                                                                                                         | 6       |
| Quantitative variables       | 11      | Explain how quantitative variables were handled in the analyses. If applicable, describe which groupings were chosen and why                                                                      | 8-10    |
| Statistical methods          | 12      | (a) Describe all statistical methods, including those used to control for confounding                                                                                                             | 8-11    |
|                              |         | (b) Describe any methods used to examine subgroups and interactions                                                                                                                               | 9-10    |
|                              |         | (c) Explain how missing data were addressed                                                                                                                                                       | 6       |
|                              |         | (d) If applicable, describe analytical methods taking account of sampling strategy                                                                                                                | N/A     |
|                              |         | (e) Describe any sensitivity analyses                                                                                                                                                             | 10-11   |
| <b>Results</b>               |         |                                                                                                                                                                                                   |         |
| Participants                 | 13*     | (a) Report numbers of individuals at each stage of study—eg numbers potentially eligible, examined for eligibility, confirmed eligible, included in the study, completing follow-up, and analysed | 6       |
|                              |         | (b) Give reasons for non-participation at each stage                                                                                                                                              | N/A     |
|                              |         | (c) Consider use of a flow diagram                                                                                                                                                                | N/A     |
| Descriptive data             | 14*     | (a) Give characteristics of study participants (eg demographic, clinical, social) and information on exposures and potential confounders                                                          | 11      |
|                              |         | (b) Indicate number of participants with missing data for each variable of interest                                                                                                               | N/A     |
| Outcome data                 | 15*     | Report numbers of outcome events or summary measures                                                                                                                                              | 11      |

|                          |    |                                                                                                                                                                                                              |              |
|--------------------------|----|--------------------------------------------------------------------------------------------------------------------------------------------------------------------------------------------------------------|--------------|
| Main results             | 16 | (a) Give unadjusted estimates and, if applicable, confounder-adjusted estimates and their precision (eg, 95% confidence interval). Make clear which confounders were adjusted for and why they were included | 7, 11-12, 21 |
|                          |    | (b) Report category boundaries when continuous variables were categorized                                                                                                                                    | N/A          |
|                          |    | (c) If relevant, consider translating estimates of relative risk into absolute risk for a meaningful time period                                                                                             | 12           |
| Other analyses           | 17 | Report other analyses done—eg analyses of subgroups and interactions, and sensitivity analyses                                                                                                               | 12           |
| <b>Discussion</b>        |    |                                                                                                                                                                                                              |              |
| Key results              | 18 | Summarise key results with reference to study objectives                                                                                                                                                     | 13           |
| Limitations              | 19 | Discuss limitations of the study, taking into account sources of potential bias or imprecision. Discuss both direction and magnitude of any potential bias                                                   | 14-15        |
| Interpretation           | 20 | Give a cautious overall interpretation of results considering objectives, limitations, multiplicity of analyses, results from similar studies, and other relevant evidence                                   | 13-16        |
| Generalisability         | 21 | Discuss the generalisability (external validity) of the study results                                                                                                                                        | 13           |
| <b>Other information</b> |    |                                                                                                                                                                                                              |              |
| Funding                  | 22 | Give the source of funding and the role of the funders for the present study and, if applicable, for the original study on which the present article is based                                                | 1            |

\*Give information separately for exposed and unexposed groups.

Note: An Explanation and Elaboration article discusses each checklist item and gives methodological background and published examples of transparent reporting. The STROBE checklist is best used in conjunction with this article (freely available on the Web sites of PLoS Medicine at <http://www.plosmedicine.org/>, Annals of Internal Medicine at <http://www.annals.org/>, and Epidemiology at <http://www.epidem.com/>). Information on the STROBE Initiative is available at [www.strobe-statement.org](http://www.strobe-statement.org). Page numbers reference the main text.

## REFERENCES

1. Gun Violence Archive. Accessed June 3, 2020. <https://www.gunviolencearchive.org/>
2. Mervosh S, Lu D, Swales V. See Which States and Cities Have Told Residents to Stay at Home. *The New York Times*. <https://www.nytimes.com/interactive/2020/us/coronavirus-stay-at-home-order.html>. Published April 20, 2020. Accessed June 14, 2020.
3. Mervosh S, Lee JC, Gamio L, Popovich N. See How All 50 States Are Reopening. *The New York Times*. <https://www.nytimes.com/interactive/2020/us/states-reopen-map-coronavirus.html>. Published June 12, 2020. Accessed June 14, 2020.
4. COVID-19 - Mobility Trends Reports. Apple. Accessed June 14, 2020. <https://www.apple.com/covid19/mobility>
5. Healy K. *Covdata: COVID-19 Case and Mortality Time Series*.; 2020. Accessed June 10, 2020. <http://kjhealy.github.io/covdata>
6. Robert Wood Johnson Foundation, University of Wisconsin Population Health Institute. Rankings & Data Documentation. County Health Rankings & Roadmaps. Accessed June 14, 2020. <https://www.countyhealthrankings.org/explore-health-rankings/rankings-data-documentation>
7. Massey DS, Denton NA. The dimensions of residential segregation. *Soc Forces*. 1988;67(2):281-315.
8. Centers for Disease Control and Prevention. Fatal Injury Data. Web-based Injury Statistics Query and Reporting System (WISQARS). <https://www.cdc.gov/injury/wisqars/fatal.html>
9. Azrael D, Cook PJ, Miller M. State and local prevalence of firearms ownership measurement, structure, and trends. *J Quant Criminol*. 2004;20(1):43-62.
10. Barton C, Nass D, Johnson K. Gun Shops Flouted State Closures, Fueling Coronavirus Sales Boom. *The Trace*. <https://www.thetrace.org/2020/05/coronavirus-gun-sales-state-closures-background-checks/>. Published May 14, 2020. Accessed June 3, 2020.
